# Supplementary material for: Associations between self-reported sleep duration and incident cardiovascular diseases in a nationwide prospective cohort study of Chinese middle-aged and older adults
Source: PubMed Central journal article supplement (PMC11664438; doi:10.3389/fcvm.2024.1474426), 2024-12-09
Supplement: Datasheet1.pdf [file Datasheet1.pdf]

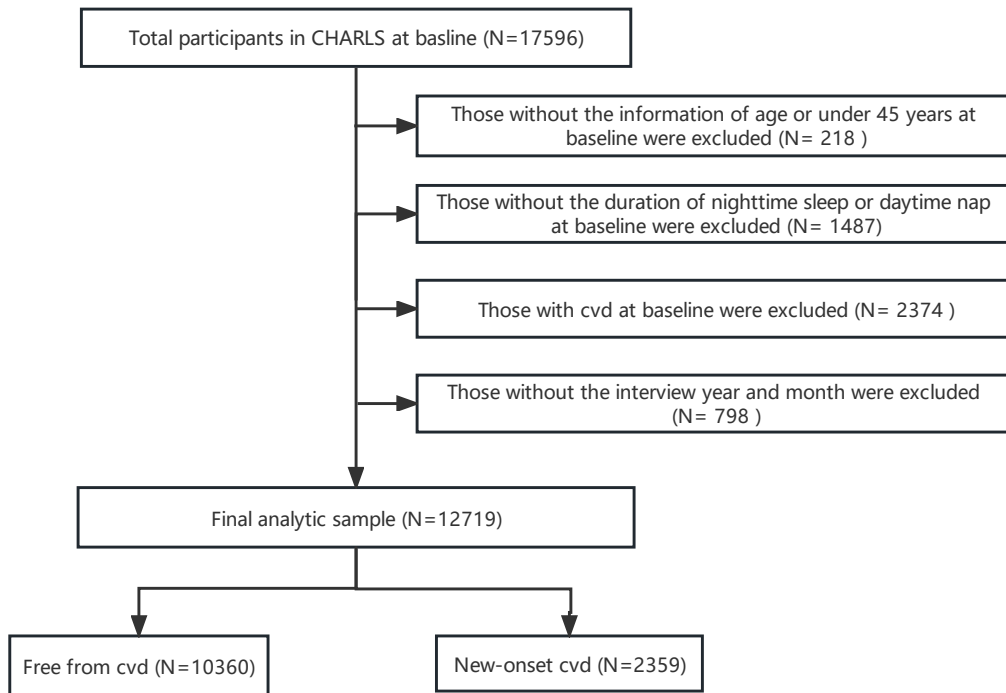

**Supplementary Figure 1** Flowchart of subject selection.

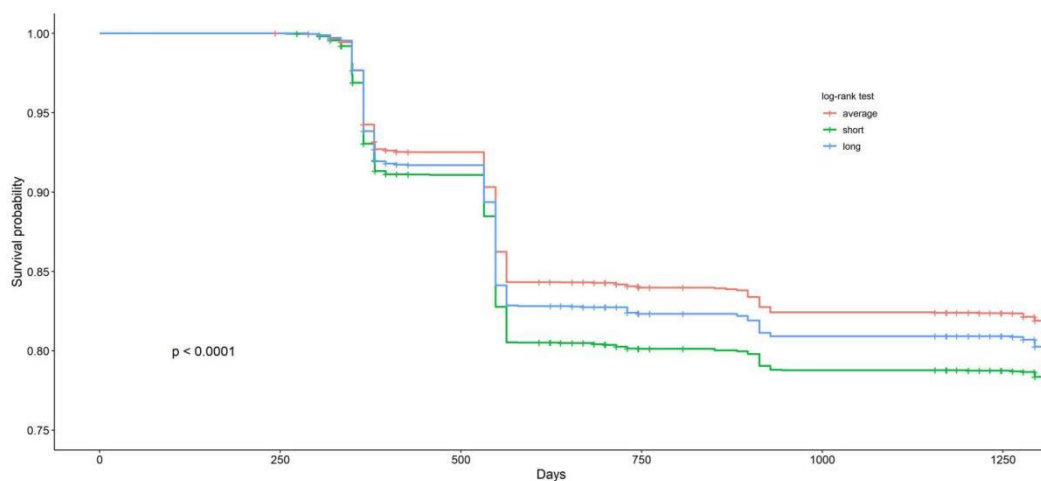

**Supplementary Figure 2** Kaplan-Meier curves for the cumulative risk of

### CVD by sleep duration categories

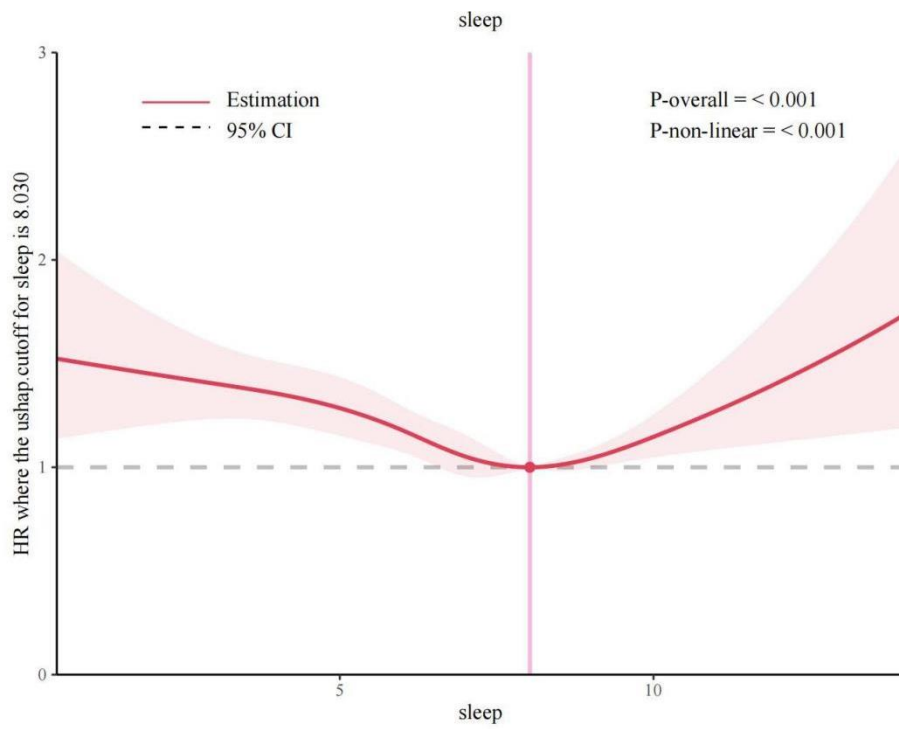

**Supplementary Figure 3** Restricted cubic spline analysis of the relationship between sleep duration and incident CVD.
